# Supplementary material for: Combinatorial Effect of Multiple Abiotic Factors on Up-Regulation of Carotenoids and Lipids in Monoraphidium sp. for Pharmacological and Nutraceutical Applications
Source: MDPI journal article supplement (doi:10.3390/app13106107), 2023-05-16
Supplement: s1 [file s1]

**Supplementary**

**Table S1** Optimization of a combination of nutrients and light by RSM-CCD matrix for the analysis of chlorophyll *a* and *b*

| Run | Factor |        | Factor |                                        | Factor<br>E : PP<br>(h) | Chlorophyll <i>a</i> |           | Chlorophyll <i>b</i> |           |
|-----|--------|--------|--------|----------------------------------------|-------------------------|----------------------|-----------|----------------------|-----------|
|     | Factor | B:     | Factor | D : LI                                 |                         | productivity         |           | productivity         |           |
|     | A:N    | P+K    | C: S   | ( $\mu\text{molm}^{-2}\text{s}^{-1}$ ) |                         |                      |           |                      |           |
|     | (mg/L) | (mg/L) | (mg/L) |                                        |                         | Actual               | Predicted | Actual               | Predicted |
|     |        |        |        |                                        |                         | Value                | Value     | Value                | Value     |
| 1   | 2500   | 250    | 70     | 137.5                                  | 12                      | 9.76                 | 11.19     | 6.11                 | 3.71      |
| 2   | 2500   | 0      | 70     | 137.5                                  | 24                      | 11.12                | 11.65     | 3.17                 | 5.93      |
| 3   | 2500   | 500    | 70     | 137.5                                  | 24                      | 12.47                | 13.35     | 7.16                 | 5.26      |
| 4   | 2500   | 0      | 140    | 137.5                                  | 12                      | 11.16                | 10.63     | 6.4                  | 4.11      |
| 5   | 5000   | 250    | 70     | 137.5                                  | 0                       | 3.01                 | 3.82      | 2.78                 | 3.44      |
| 6   | 5000   | 250    | 70     | 75                                     | 12                      | 9                    | 9.85      | 10.19                | 4.75      |
| 7   | 2500   | 250    | 140    | 75                                     | 12                      | 9.55                 | 11        | 4.34                 | 3.21      |
| 8   | 5000   | 0      | 70     | 137.5                                  | 12                      | 10.52                | 10.55     | 9.07                 | 5.65      |
| 9   | 2500   | 250    | 0      | 200                                    | 12                      | 13.97                | 13.23     | 6.9                  | 4.22      |
| 10  | 2500   | 250    | 0      | 137.5                                  | 24                      | 12.45                | 12.59     | 6.95                 | 5.54      |
| 11  | 2500   | 250    | 140    | 137.5                                  | 24                      | 12.96                | 11.44     | 3.99                 | 5.65      |
| 12  | 0      | 250    | 70     | 137.5                                  | 24                      | 12.6                 | 11.92     | 1.47                 | 3.99      |
| 13  | 2500   | 500    | 70     | 137.5                                  | 0                       | 4.4                  | 4.44      | 0.2385               | 1.5       |
| 14  | 0      | 0      | 70     | 137.5                                  | 12                      | 10.3                 | 12.26     | 1.48                 | 2.45      |
| 15  | 2500   | 500    | 0      | 137.5                                  | 12                      | 12.44                | 12.45     | 1.57                 | 3.32      |
| 16  | 0      | 250    | 0      | 137.5                                  | 12                      | 12.41                | 12.32     | 1.85                 | 2.05      |

|    |      |     |     |       |    |       |       |        |        |
|----|------|-----|-----|-------|----|-------|-------|--------|--------|
| 17 | 0    | 250 | 140 | 137.5 | 12 | 9.34  | 10.42 | 1.68   | 2.17   |
| 18 | 2500 | 0   | 70  | 75    | 12 | 13.6  | 12.86 | 1.49   | 3.49   |
| 19 | 2500 | 250 | 70  | 200   | 0  | 3.7   | 3.9   | 2.17   | 2.4    |
| 20 | 2500 | 250 | 70  | 200   | 24 | 12.35 | 12.83 | 6.89   | 6.16   |
| 21 | 2500 | 500 | 70  | 75    | 12 | 7.2   | 9.1   | 2.37   | 2.81   |
| 22 | 2500 | 250 | 70  | 75    | 24 | 11.74 | 10.7  | 5.59   | 5.03   |
| 23 | 2500 | 250 | 0   | 75    | 12 | 10.58 | 9.99  | 1.14   | 3.09   |
| 24 | 0    | 500 | 70  | 137.5 | 12 | 11.47 | 11.44 | 0.3587 | 1.78   |
| 25 | 5000 | 250 | 70  | 137.5 | 24 | 10.88 | 12.07 | 5.82   | 7.2    |
| 26 | 0    | 250 | 70  | 137.5 | 0  | 4.74  | 3.68  | 1.2    | 0.2308 |
| 27 | 2500 | 500 | 70  | 200   | 12 | 14.66 | 15.33 | 6.46   | 3.94   |
| 28 | 2500 | 250 | 70  | 137.5 | 12 | 12.59 | 11.19 | 3.59   | 3.71   |
| 29 | 2500 | 0   | 0   | 137.5 | 12 | 11.21 | 12.22 | 2.75   | 3.99   |
| 30 | 5000 | 500 | 70  | 137.5 | 12 | 15.41 | 13.45 | 5.98   | 4.98   |
| 31 | 2500 | 0   | 70  | 137.5 | 0  | 4.39  | 4.08  | 1.68   | 2.17   |
| 32 | 2500 | 250 | 70  | 137.5 | 12 | 11.23 | 11.19 | 4      | 3.71   |
| 33 | 2500 | 500 | 140 | 137.5 | 12 | 13.99 | 12.47 | 0.5249 | 3.43   |
| 34 | 2500 | 250 | 70  | 75    | 0  | 4.47  | 3.15  | 0.6074 | 1.27   |
| 35 | 2500 | 250 | 140 | 137.5 | 0  | 3.58  | 3.57  | 1.76   | 1.89   |
| 36 | 2500 | 250 | 0   | 137.5 | 0  | 2.32  | 3.98  | 0.5298 | 1.78   |
| 37 | 5000 | 250 | 140 | 137.5 | 12 | 11.92 | 11.68 | 4.92   | 5.37   |
| 38 | 0    | 250 | 70  | 75    | 12 | 11.61 | 11.09 | 4.77   | 1.55   |

|    |      |     |     |       |    |       |       |      |      |
|----|------|-----|-----|-------|----|-------|-------|------|------|
| 39 | 2500 | 0   | 70  | 200   | 12 | 11.47 | 9.51  | 3.97 | 4.61 |
| 40 | 0    | 250 | 70  | 200   | 12 | 11.81 | 11.15 | 7.22 | 2.67 |
| 41 | 5000 | 250 | 70  | 200   | 12 | 11.96 | 12.68 | 4.29 | 5.88 |
| 42 | 2500 | 250 | 140 | 200   | 12 | 9.34  | 10.64 | 1.63 | 4.33 |
| 43 | 5000 | 250 | 0   | 137.5 | 12 | 12.76 | 11.35 | 2.64 | 5.26 |

---

## Figures

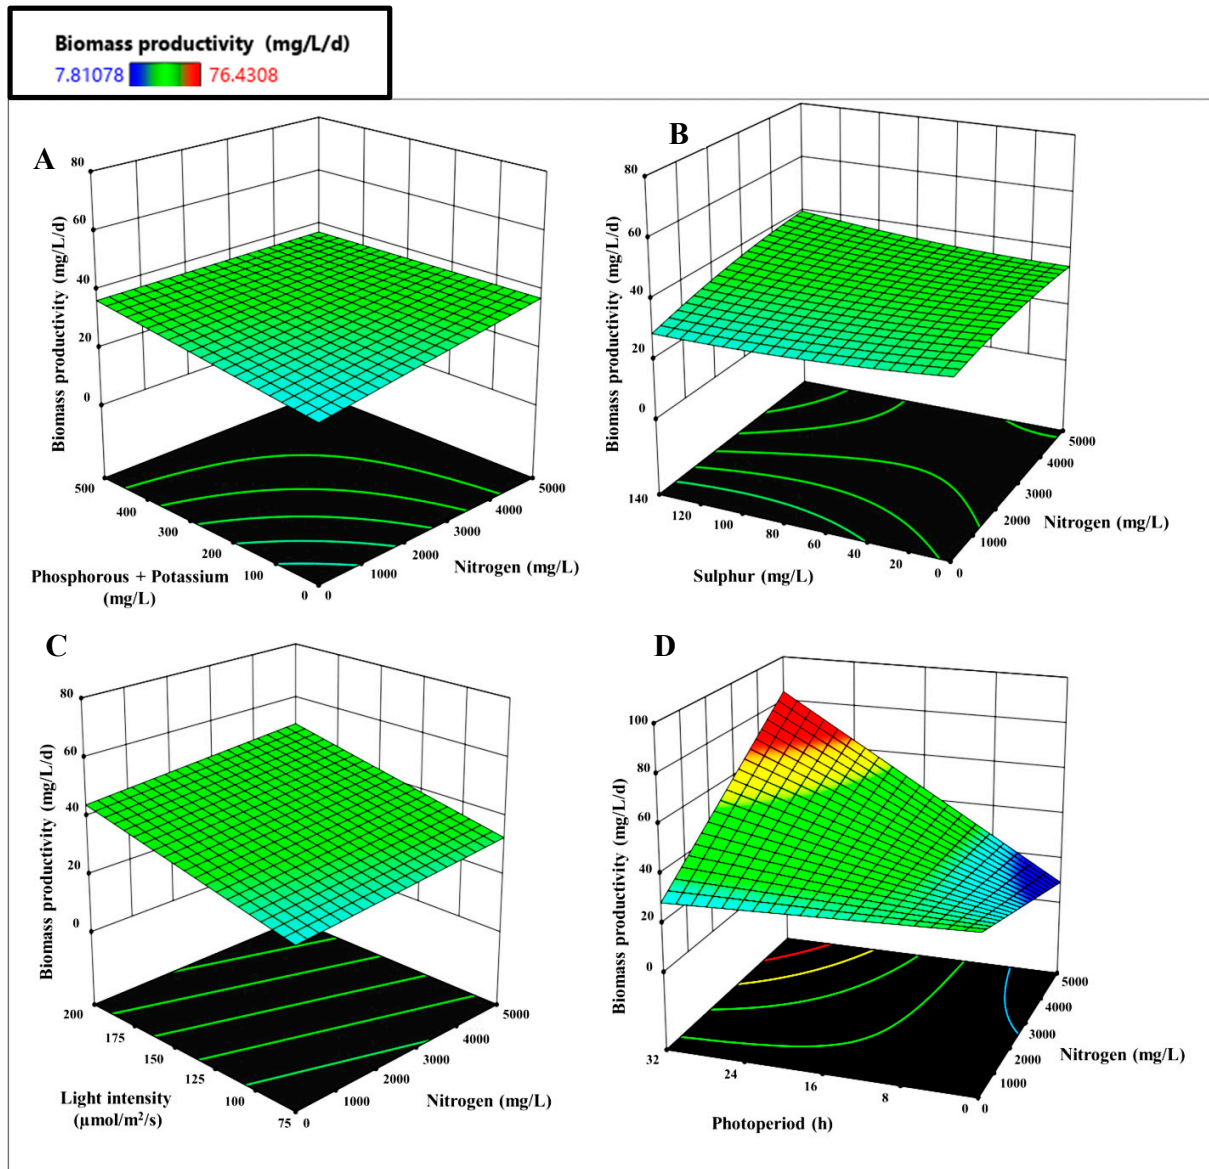



**E**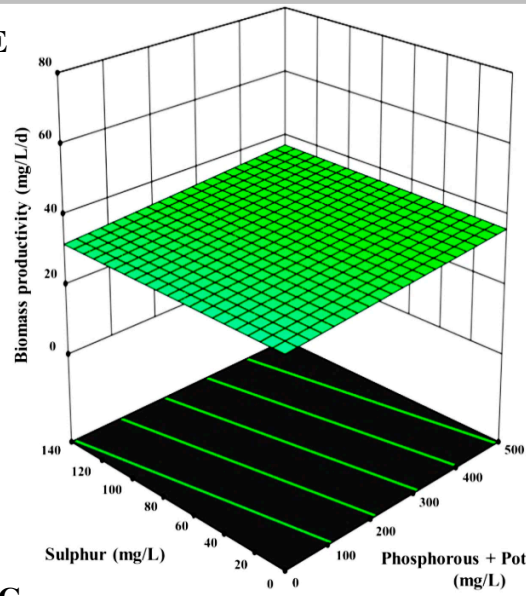**F**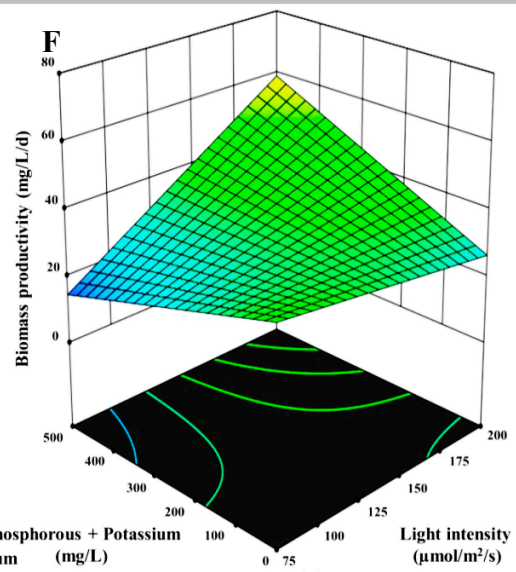**G**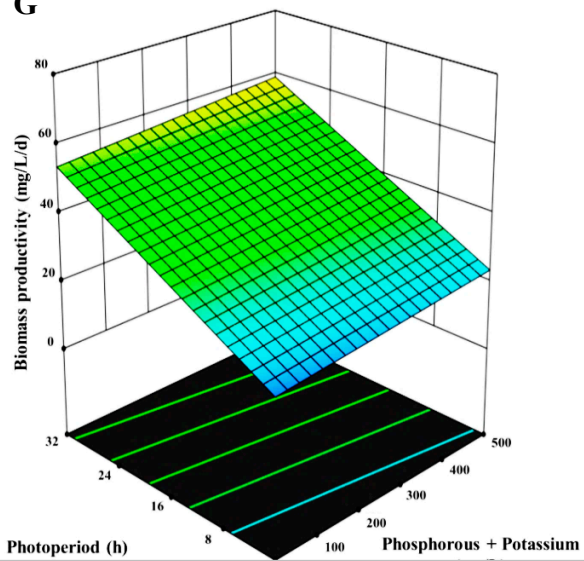**H**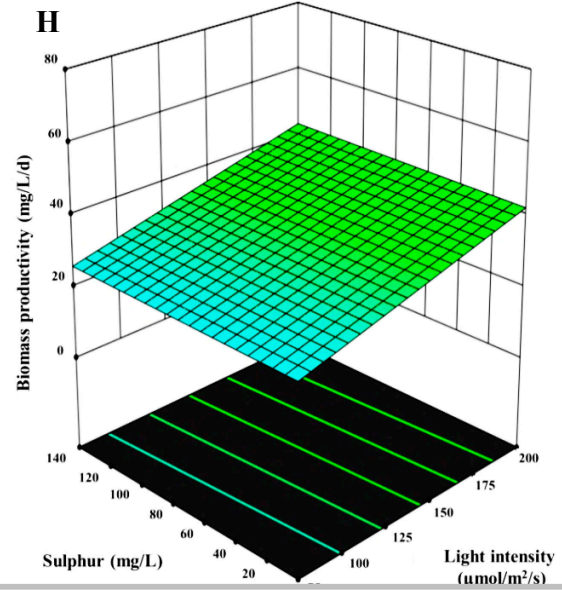

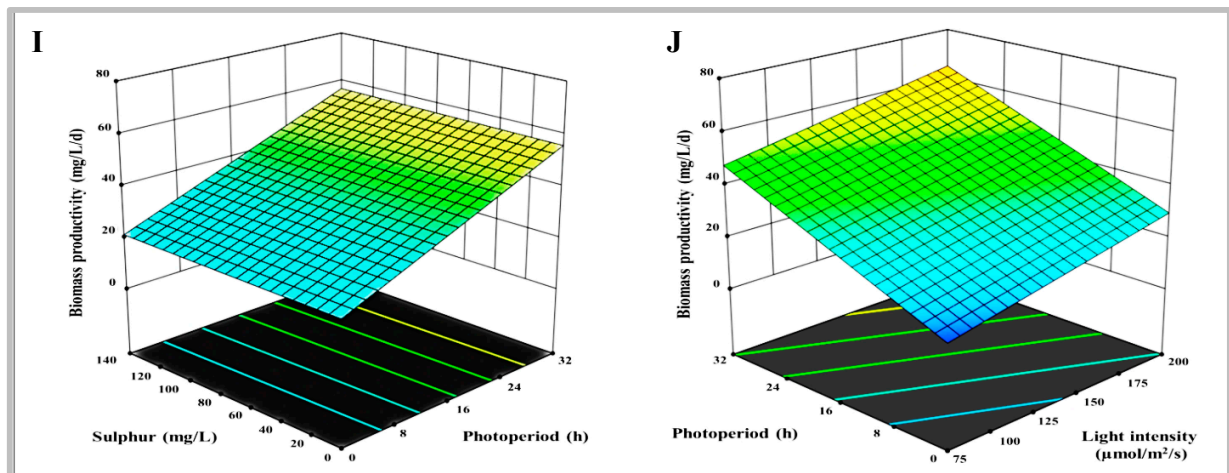

**Figure S1.** Response surface plot with contour lines for biomass productivity ( $\text{mg L}^{-1}\text{d}^{-1}$ ) with varying abiotic stress variable a) Nitrogen with Phosphorous and potassium b) Nitrogen with Sulphur c) Nitrogen with Light Intensity d) Nitrogen with Photoperiod e) Phosphorous and potassium with Sulphur f) Phosphorous and potassium with Light Intensity g) Phosphorous and potassium with Photoperiod h) Sulphur with Light Intensity i) Sulphur with Photoperiod and j) Light Intensity with Photoperiod

**Lipid Content (%)**  
4.17283  40.8324

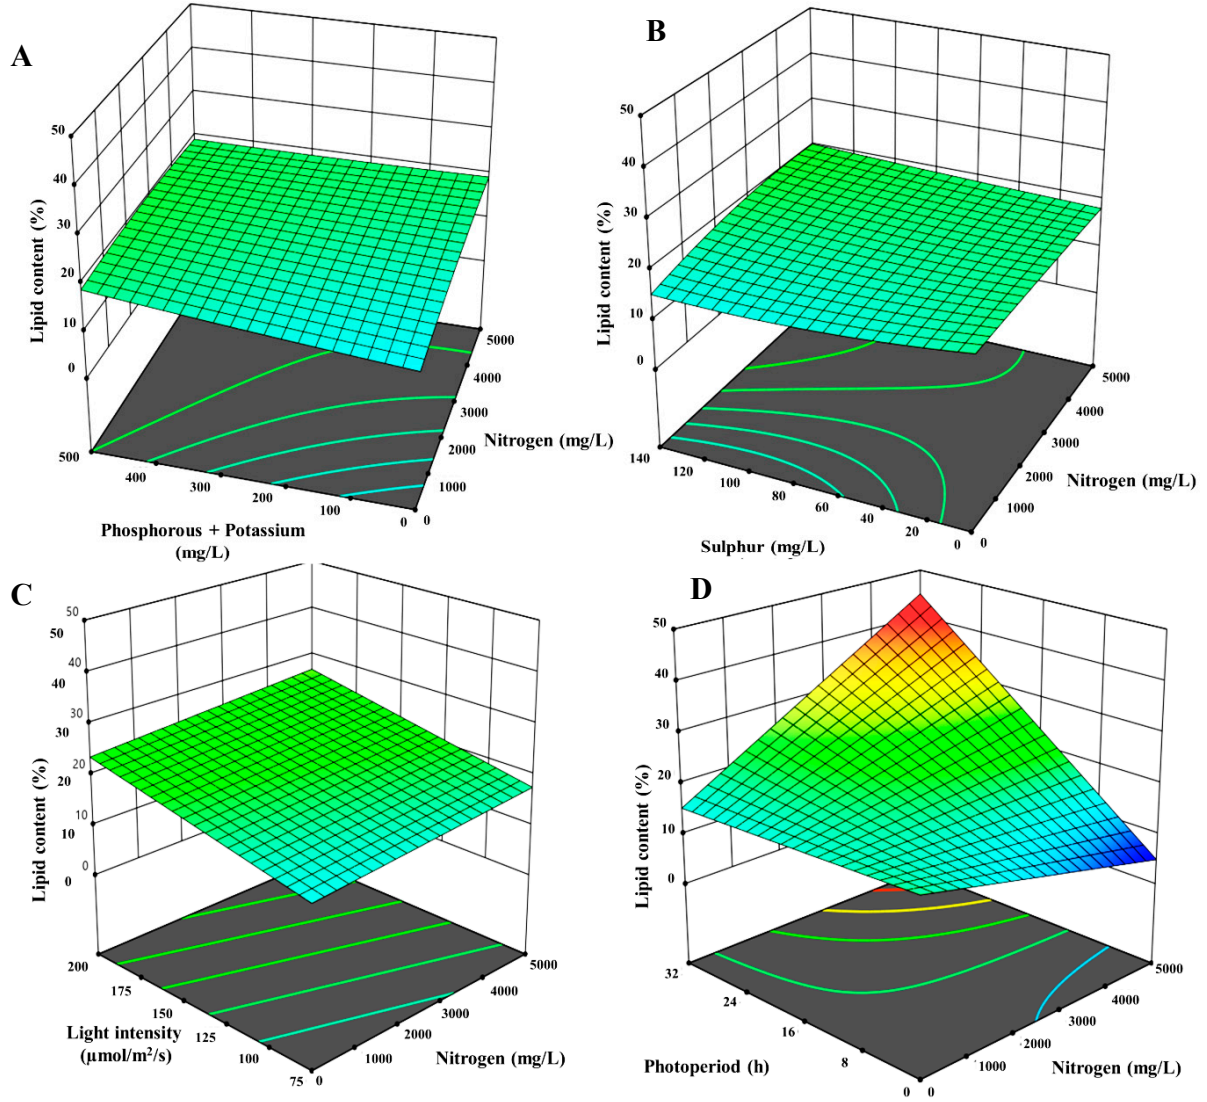

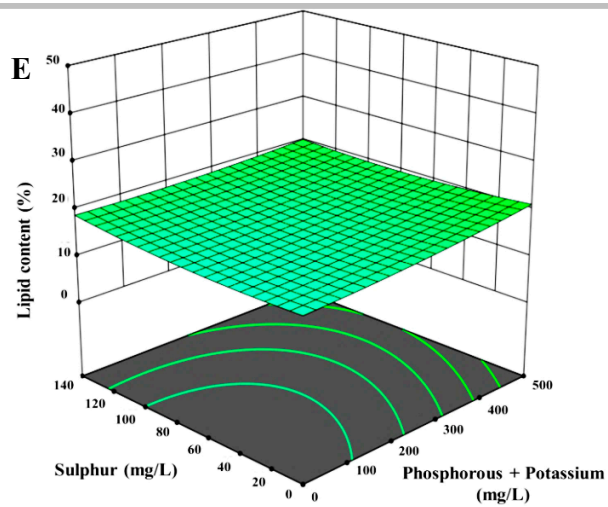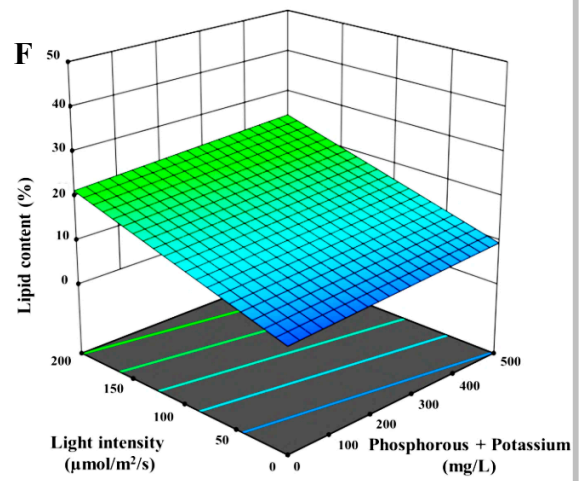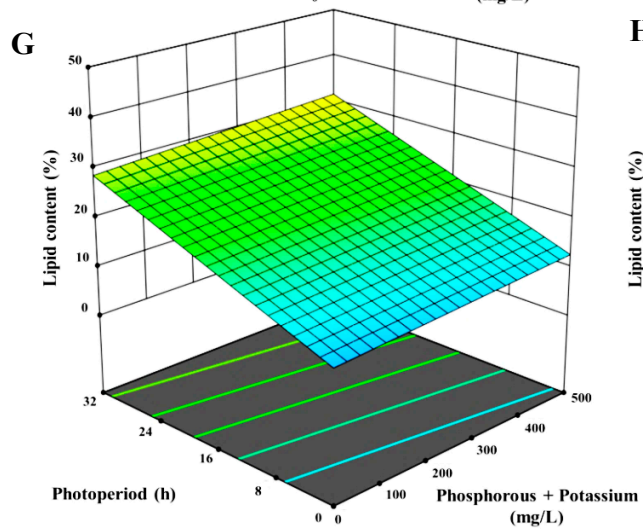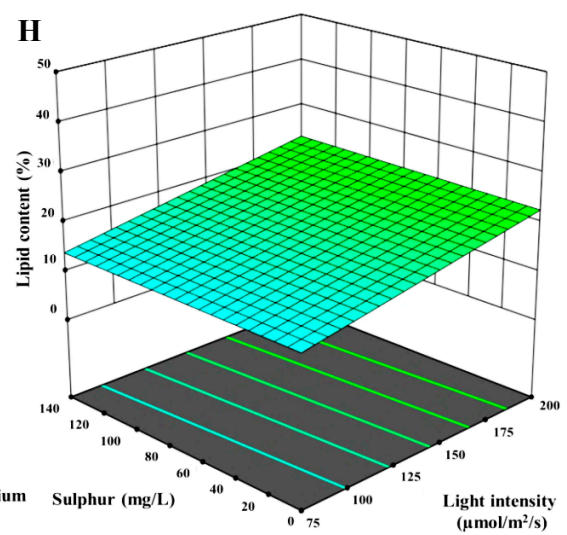

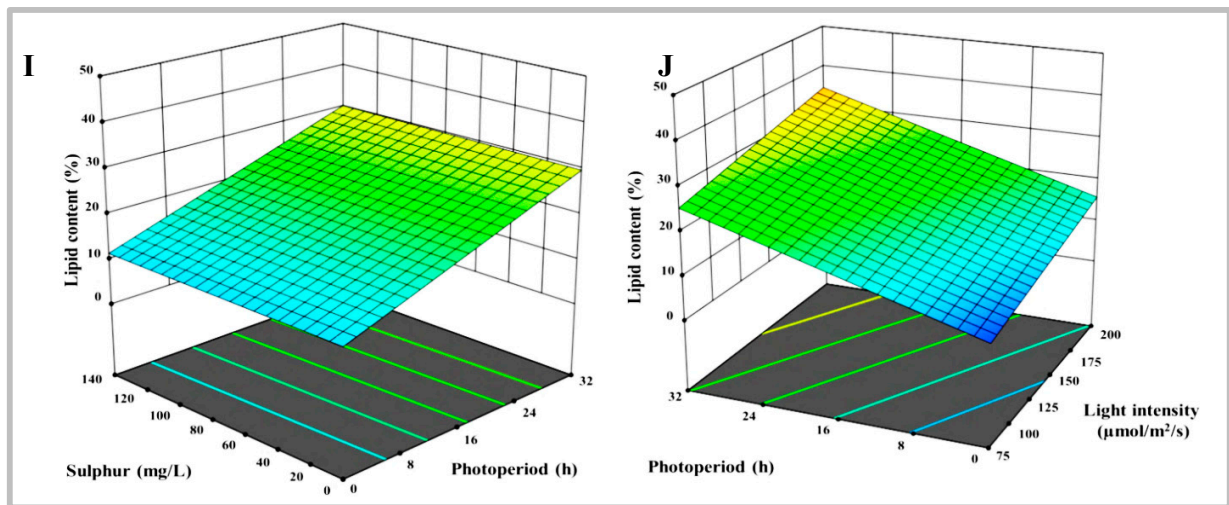

**Figure S2.** Response surface plot with contour lines for lipid content (%) with varying abiotic variable a) Nitrogen with Phosphorous and potassium b) Nitrogen with Sulphur c) Nitrogen with Light Intensity d) Nitrogen with Photoperiod e) Phosphorous and potassium with Sulphur f) Phosphorous and potassium with Light Intensity g) Phosphorous and potassium with Photoperiod h) Sulphur with Light Intensity i) Sulphur with Photoperiod and j) Light Intensity with Photoperiod



Total Carotenoid ( $\mu\text{g/ml}$ )  
0.783635 16.2665

A

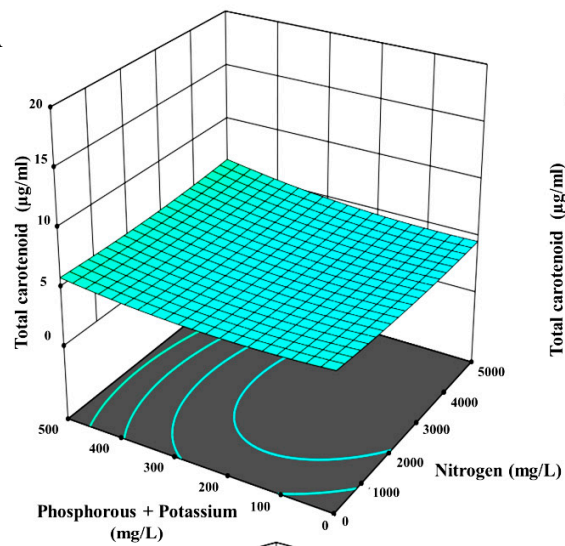

B

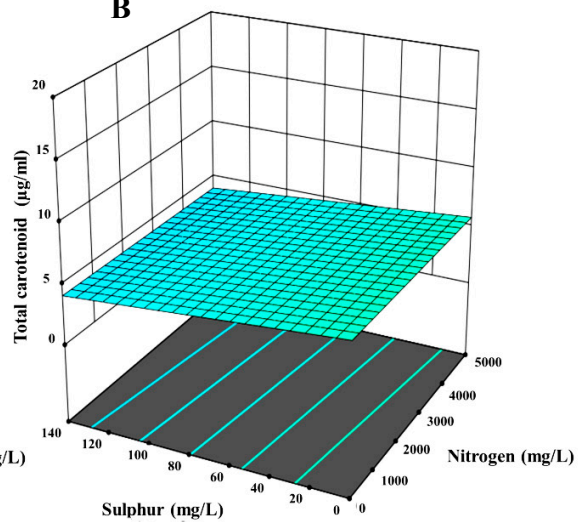

C

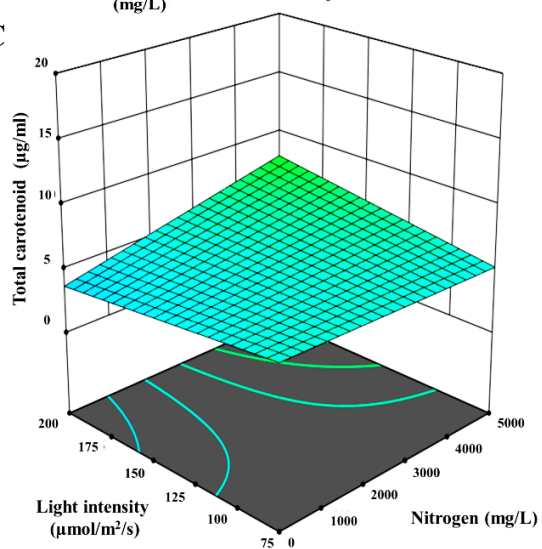

D

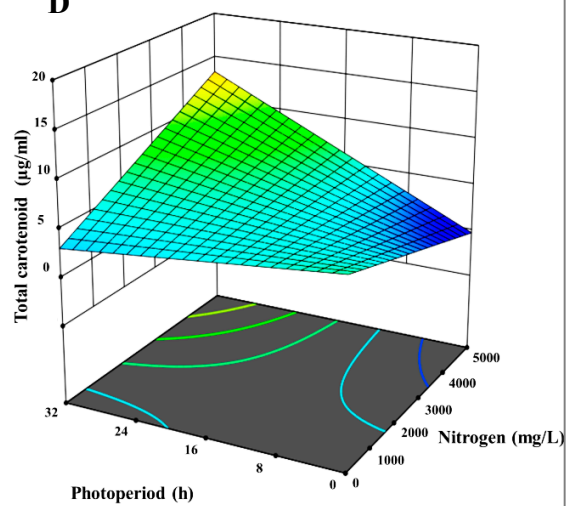

**E**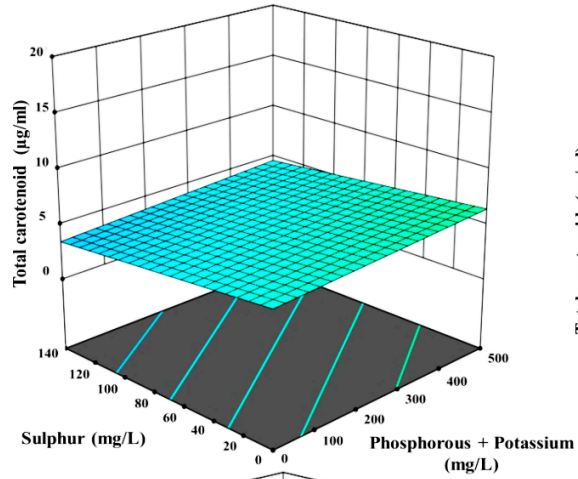**F**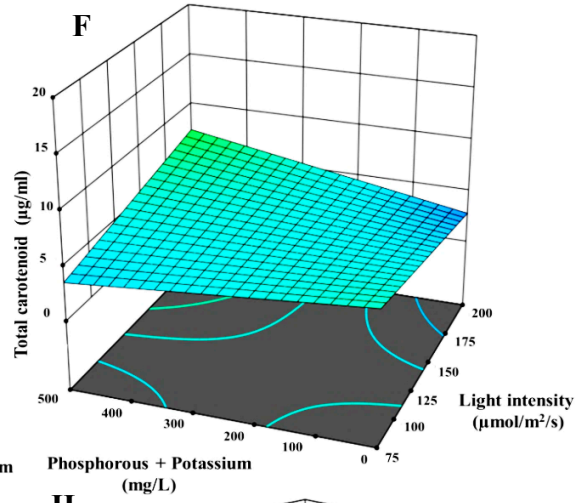**G**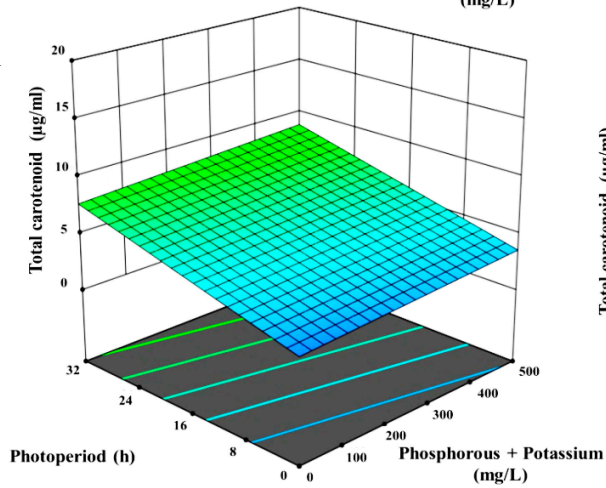**H**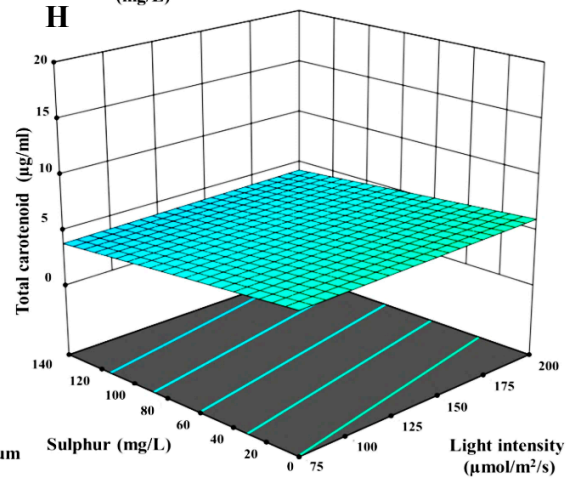**I**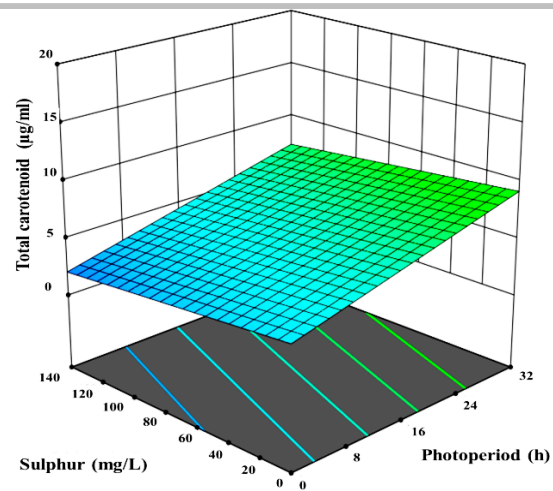**J**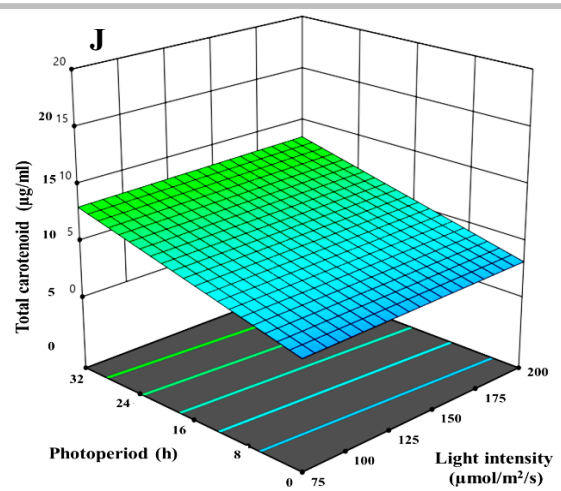

**Figure S3.** Response surface plot with contour lines for total carotenoid productivity ( $\mu\text{g mL}^{-1}$ ) with varying abiotic stress variables a) Nitrogen with Phosphorous and potassium b) Nitrogen with Sulphur c) Nitrogen with Light Intensity d) Nitrogen with Photoperiod e) Phosphorous and potassium with Sulphur f) Phosphorous and potassium with Light Intensity g) Phosphorous and potassium with Photoperiod h) Sulphur with Light Intensity i) Sulphur with Photoperiod and j) Light Intensity with Photoperiod



Chlorophyll a ( $\mu\text{g/ml}$ )

2.3236

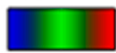

15.4106

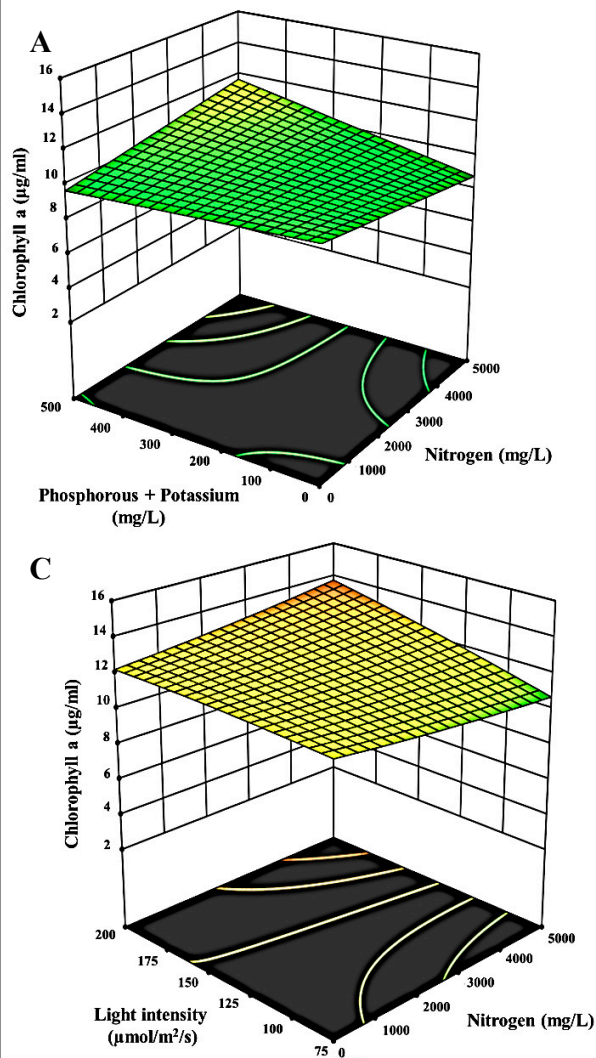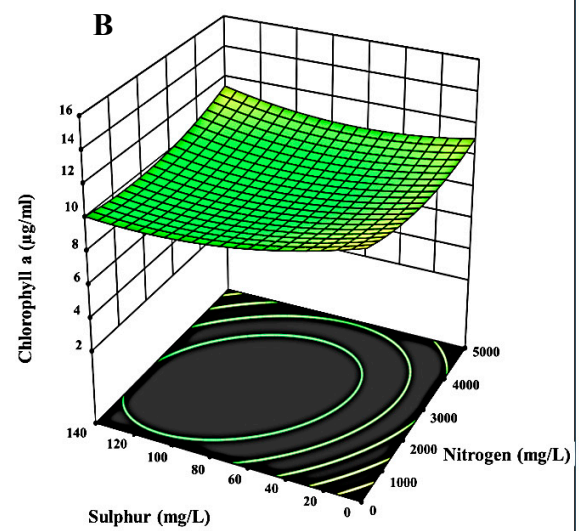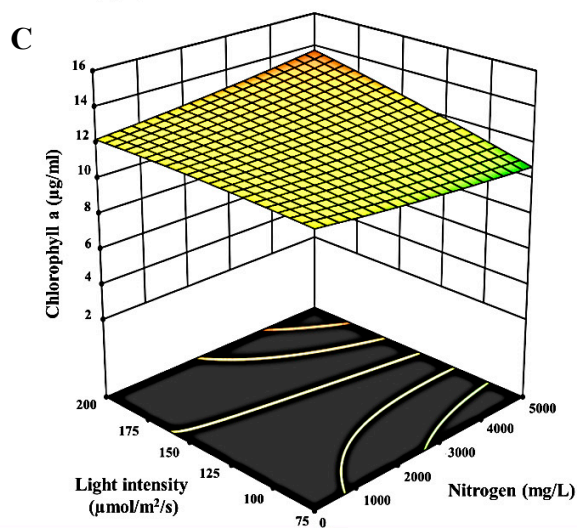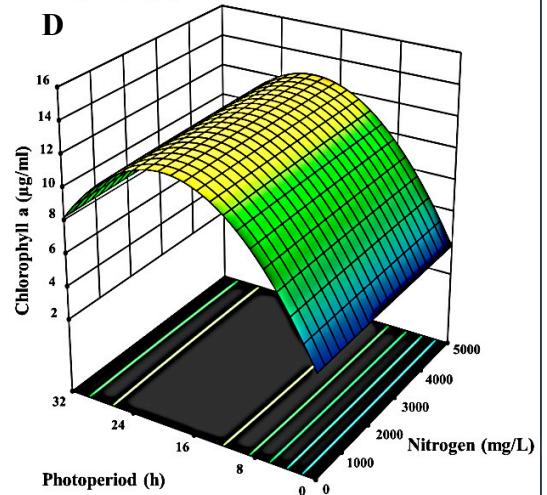

**E**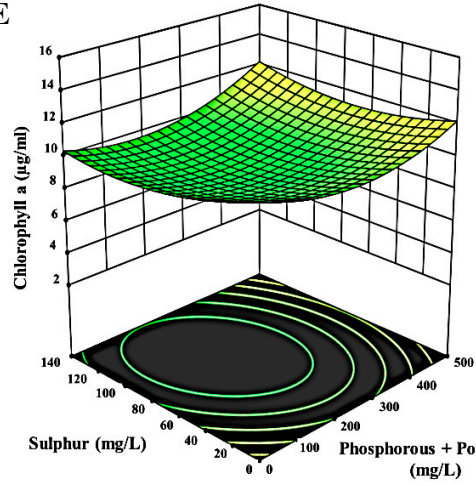**F**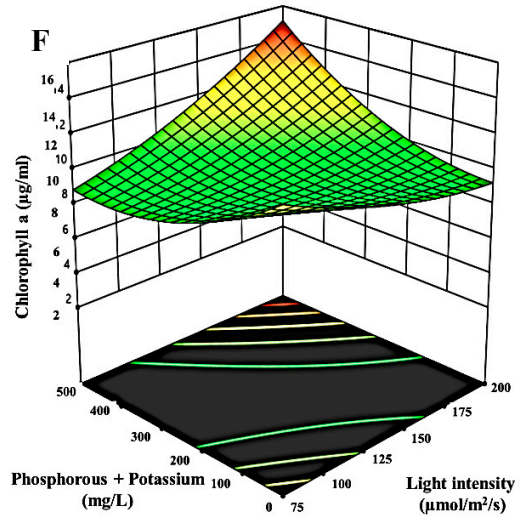**G**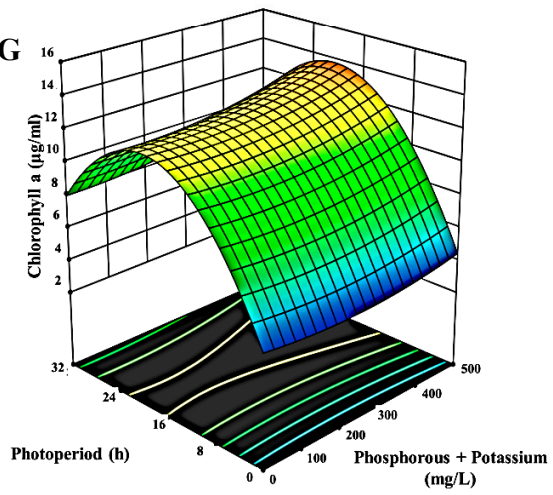**H**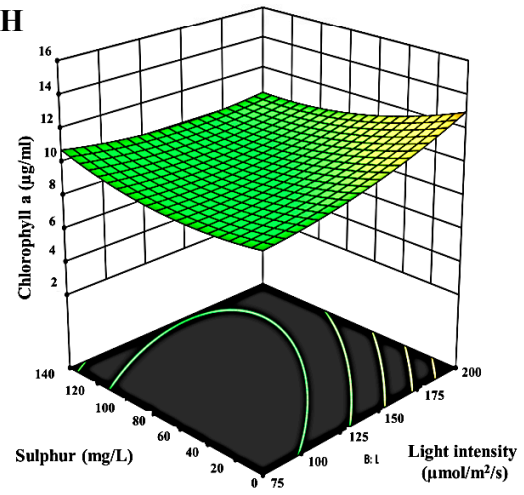

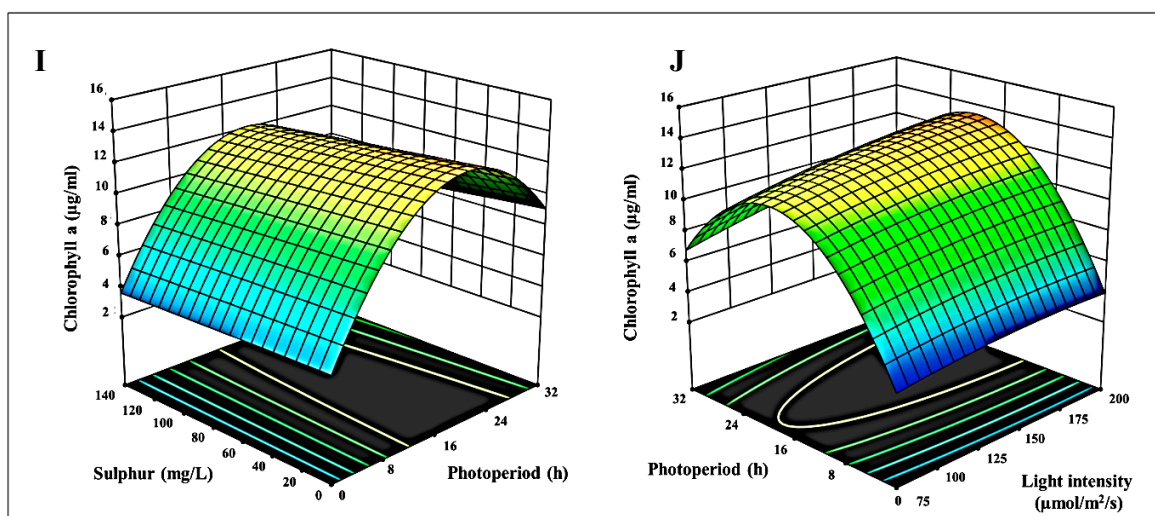

**Figure S4.** 3-D surface and contour plots representing the interaction between the selected parameters on Chlorophyll a yield ( $\mu\text{g ml}^{-1}$ ), a) Nitrogen with Phosphorous and potassium b) Nitrogen with Sulphur c) Nitrogen with Light Intensity d) Nitrogen with Photoperiod e) Phosphorous and potassium with Sulphur f) Phosphorous and potassium with Light Intensity g) Phosphorous and potassium with Photoperiod h) Sulphur with Light Intensity i) Sulphur with Photoperiod and j) Light Intensity with Photoperiod

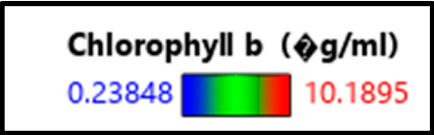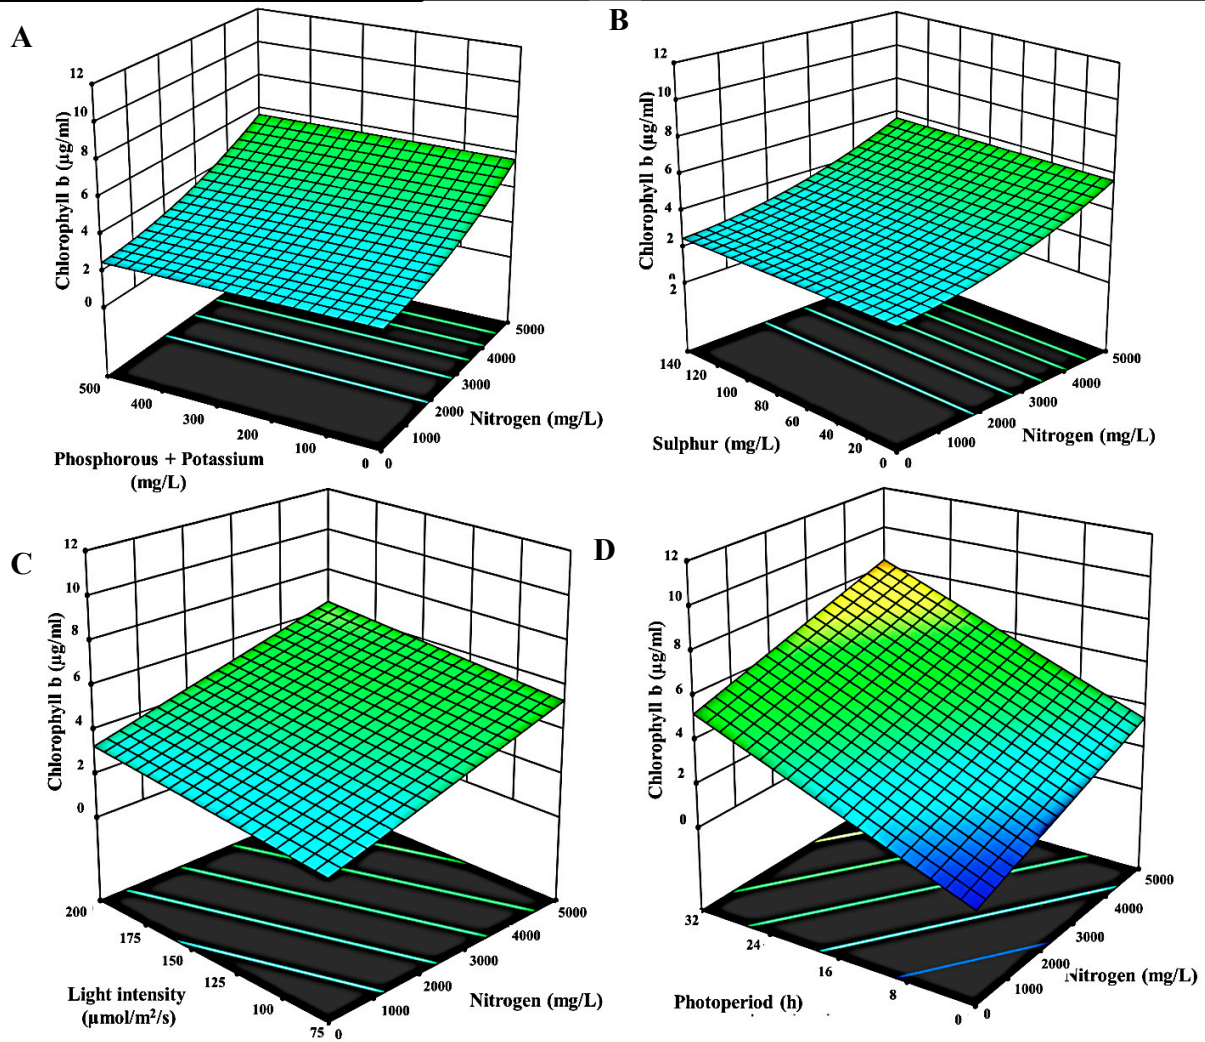



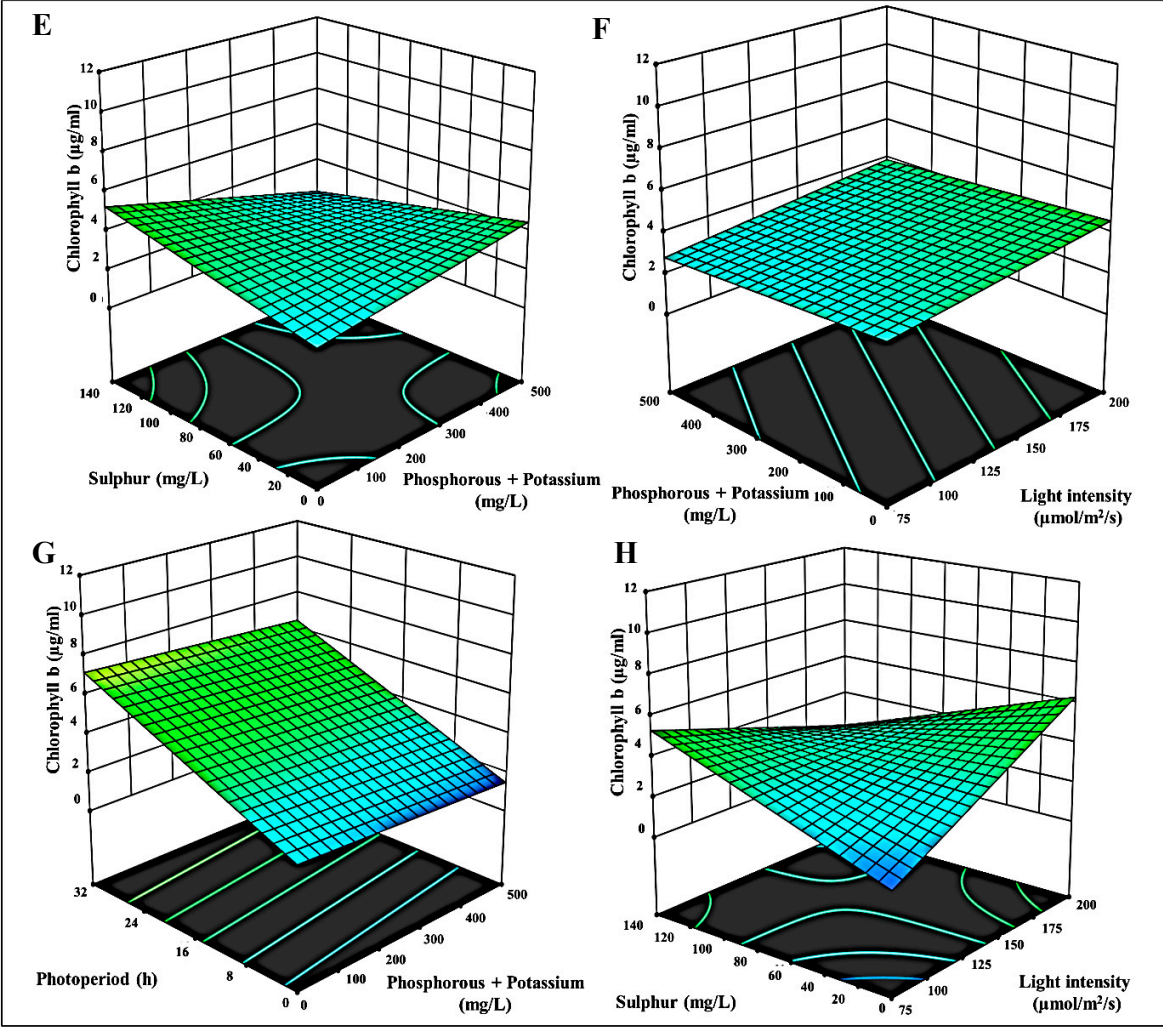

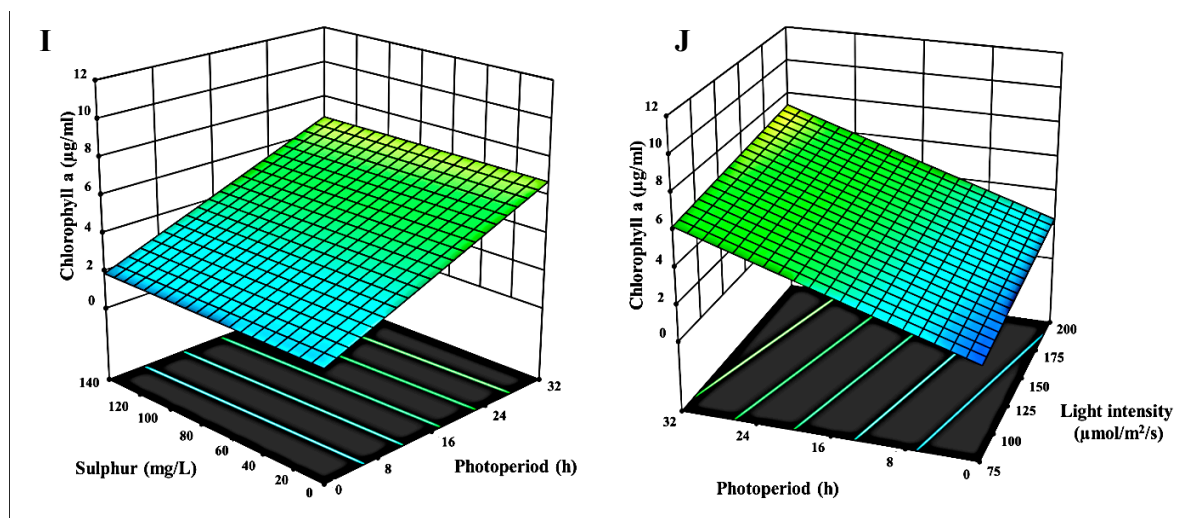

**Figure S5.** 3-D surface and contour plots representing the interaction between the selected parameters on Chlorophyll b yield ( $\mu\text{g ml}^{-1}$ ), a) Nitrogen with Phosphorous and potassium b) Nitrogen with Sulphur c) Nitrogen with Light Intensity d) Nitrogen with Photoperiod e) Phosphorous and potassium with Sulphur f) Phosphorous and potassium with Light Intensity g) Phosphorous and potassium with Photoperiod h) Sulphur with Light Intensity i) Sulphur with Photoperiod and j) Light Intensity with Photoperiod
